# Supplementary material for: Establishment of a Mouse Degenerative Model of Patellar Tendinopathy with Upregulation of Inflammation
Source: MDPI journal article supplement (doi:10.3390/ijms25073847), 2024-03-29
Supplement: s1 [file s1]

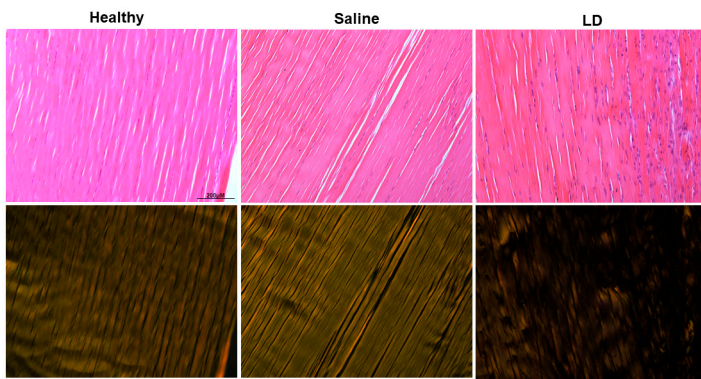

**Supplementary material Figure S1.** Photomicrographs showing histology and corresponding polarized images of healthy tendons, tendons in the saline group and LD group at week 1 after injection. Scale bar: 200  $\mu\text{m}$ ; stain: haematoxylin and eosin; n=4/group

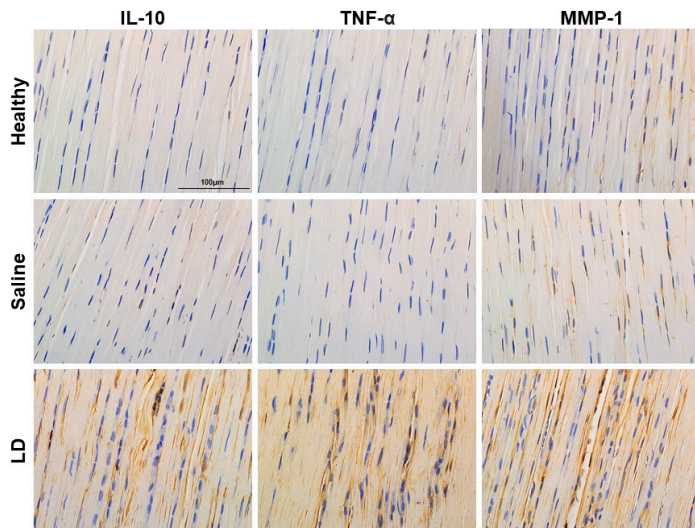

**Supplementary material Figure S2.** Photomicrographs showing immunohistochemical staining of IL-10; TNF- $\alpha$ ; and MMP-1 in healthy tendons, tendons in the saline group and LD group at week 1 after injection. Scale bar: 100  $\mu\text{m}$ ; n=4/group
